# Supplementary material for: Comprehensive Biological Potential, Phytochemical Profiling Using GC-MS and LC-ESI-MS, and In-Silico Assessment of Strobilanthes glutinosus Nees: An Important Medicinal Plant
Source: MDPI journal article supplement (doi:10.3390/molecules27206885), 2022-10-14
Supplement: s1 [file s1]

**Table S1.** List of abbreviations

| Sr. | Abbreviations | Full form                                                       |
|-----|---------------|-----------------------------------------------------------------|
| 1   | DPPH          | 2,2-diphenyl-1-picryl-hydrazyl-hydrate                          |
| 2   | ABTS          | 2,2'-azino-bis(3-ethylbenzothiazoline-6-sulfonic acid           |
| 3   | CUPRAC        | cupric reducing antioxidant capacity                            |
| 4   | FRAP          | Ferric Reducing Antioxidant Power                               |
| 5   | GC-MS         | Gas chromatography–mass spectrometry                            |
| 6   | LC-ESI-MS     | Liquid Chromatography-Electrospray Ionization-Mass Spectrometry |
| 7   | ACAE          | Acarbose Equivalent                                             |
| 8   | KAE           | Kojic acid Equivalent                                           |
| 9   | TE            | Trolox Equivalent                                               |
| 10  | RT            | Retention Time                                                  |

**Table S2.** Pharmacological properties of various species of the genus *Strobilanthes*

| Sr. | Specie Name                      | Pharmacological activity                                                                              | Reference |
|-----|----------------------------------|-------------------------------------------------------------------------------------------------------|-----------|
| 1   | <i>Strobilanthes cuspidate</i>   | Anti-inflammatory, antidiabetic                                                                       | [1]       |
| 2   | <i>Strobilanthes cusia</i>       | Antipyretic, analgesic, anti-inflammatory, antiviral, antimicrobial, meningitis, encephalitis, mumps, | [2-4]     |
| 3   | <i>Strobilanthes callosus</i>    | Anti-inflammatory, antibacterial, analgesic, and anti arthritic                                       | [5-7]     |
| 4   | <i>Strobilanthes ixiocephala</i> | Anti-inflammatory and anti arthritic activities                                                       | [5]       |
| 5   | <i>Strobilanthes crispus</i>     | Antioxidant, antidiabetic, antibacterial, anticancer, and antihyperlipidemic                          | [8-11]    |
| 6   | <i>Strobilanthes kunthianus</i>  | Antioxidant activity and hepatoprotective                                                             | [12]      |
| 7   | <i>Strobilanthes glutinosus</i>  | Antioxidant and antimicrobial                                                                         | [13]      |

## References.

1. Joseph, S., L. Kumar, and V.N. Bai, *Evaluation of anti-diabetic activity of Strobilanthes cuspidata in alloxan induced diabetic rats and the effect of bioactive compounds on inhibition of [alpha]-amylase enzyme*. Journal of Pharmacognosy and Phytochemistry, 2016. **5**(3): p. 169.
2. Ho, Y.-L., et al., *Evaluation of antinociceptive, anti-inflammatory and antipyretic effects of Strobilanthes cusia leaf extract in male mice and rats*. The American journal of Chinese medicine, 2003. **31**(01): p. 61-69.
3. Mitscher, L.A. and W. Baker, *Tuberculosis: a search for novel therapy starting with natural products*. Medicinal research reviews, 1998. **18**(6): p. 363-374.
4. Tsai, Y.-C., et al., *Antiviral action of tryptanthrin isolated from Strobilanthes cusia leaf against human coronavirus NL63*. Biomolecules, 2020. **10**(3): p. 366.
5. Agarwal, R. and V. Rangari, *Antiinflammatory and antiarthritic activities of lupeol and 19 alpha-H lupeol isolated from Strobilanthes callosus and Strobilanthes ixiocephala roots*. Indian Journal of Pharmacology, 2003. **35**(6): p. 384-387.
6. Kumar, S., et al., *Acute and chronic inflammation studies of Strobilanthes callosus leaves extract on rat model*. Inflammopharmacology, 2013. **21**(3): p. 233-239.
7. Singh, B., P. Sahu, and M. Sharma, *Anti-inflammatory and antimicrobial activities of triterpenoids from Strobilanthes callosus Nees*. Phytomedicine, 2002. **9**(4): p. 355-359.
8. Abou Muamar, A.F.H., *Isolation, Identification and Evaluation of Antibacterial Activity of the Semi-purified Compound from Strobilanthes Crispus (L. Bremek)*. 1999, Universiti Putra Malaysia.
9. Bakar, M.F.A., *Effects of Strobilanthes Crispus Crude and Tea Extracts in Streptozotocin-induced Hyperglycemic Rats*. 2005, Universiti Putra Malaysia.
10. Fadzelly, A., R. Asmah, and O. Fauziah, *Effects of Strobilanthes crispus tea aqueous extracts on glucose and lipid profile in normal and streptozotocin-induced hyperglycemic rats*. Plant Foods for Human Nutrition, 2006. **61**(1): p. 6-11.
11. Ghasemzadeh, A., H.Z. Jaafar, and A. Rahmat, *Phytochemical constituents and biological activities of different extracts of Strobilanthes crispus (L.) Bremek leaves grown in different locations of Malaysia*. BMC complementary and alternative medicine, 2015. **15**(1): p. 1-10.
12. Balasubramaniam, G., et al., *Antioxidant and hepatoprotective activities of Strobilanthes kunthianus against carbon tetrachloride-induced hepatotoxicity in rats*. Pharmacognosy Journal, 2020. **12**(5).
13. Ajaib, M., et al., *Antimicrobial and antioxidant analysis of Strobilanthes glutinuous: an unexplored medicinal plant*. Bioscience Research, 2020. **17**(2): p. 1521-1534.
